# Supplementary material
Source: PubMed Central journal article supplement (PMC10349288)
Supplement: ajnmmi0013-0107-f6.pdf [file ajnmmi0013-0107-f6.pdf]

# PSMA and HER2 targeting therapy

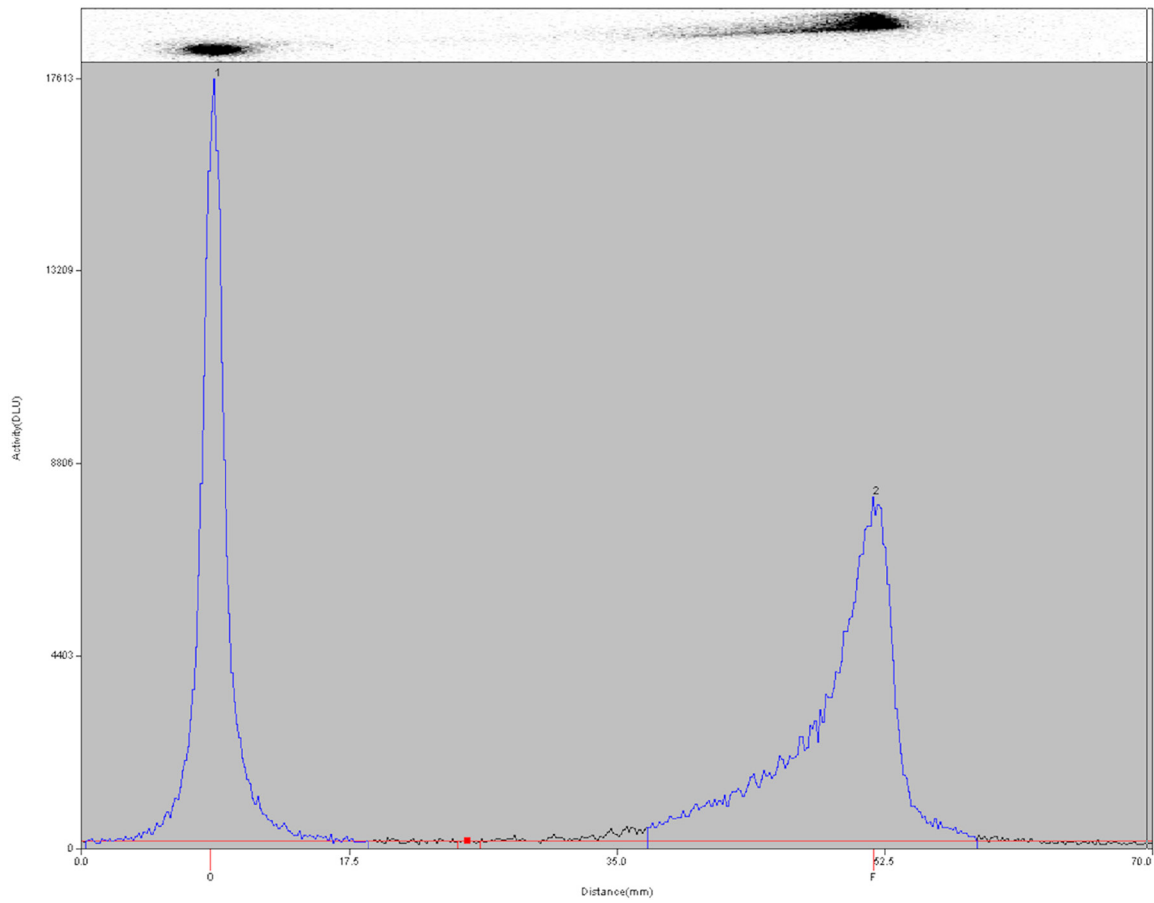

**Figure S1.** The iTLC results after radiolabeling of ABY-025 with gallium-68. [ $^{68}\text{Ga}$ ]Ga-ABY-025 at  $R_f=0$ , while free gallium-68 is at  $R_f=1$ .

PSMA and HER2 targeting therapy

File : Untitled5.tif Acquired : 10/6/2022 4:38:29 PM  
 Owner : User1 Subject : 221006\_68Ga-ABY25\_Purity

#T1 - Lane Group

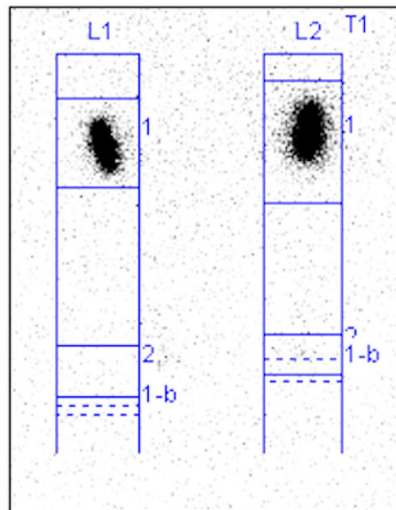

Lane #1

Background Subtraction: Regions = 49.627 DLU /mm2

| ID         | RF  | Net % Sum | Label     |
|------------|-----|-----------|-----------|
| 1 - Prof   | 0.0 | 99.9      | 68Ga-ABY  |
| 2 - Prof   | 1.0 | 0.1       | 68Ga free |
| 1-b - Prof |     |           |           |
| Lane       |     |           |           |
| UnRes      |     |           |           |

Lane #2

Background Subtraction: Regions = 57.891 DLU /mm2

| ID         | RF  | Net % Sum | Label     |
|------------|-----|-----------|-----------|
| 1 - Prof   | 0.0 | 99.5      | 68Ga-ABY  |
| 2 - Prof   | 1.0 | 0.5       | 68Ga free |
| 1-b - Prof |     |           |           |
| Lane       |     |           |           |
| UnRes      |     |           |           |

Figure S2. The iTLC results after NAP-5 purification of [<sup>68</sup>Ga]Ga-ABY-025.
